# Supplementary material for: Factors associated with non-compliance to wound care guidelines among nurses working at the University Teaching Hospital of Kigali, Rwanda
Source: Research Square preprint supplement (doi:10.21203/rs.3.rs-6235039/v1), 2025-07-22
Supplement: Supplementary file 1 [file 781be745930453f93263f481.pdf]

# QUESTIONNAIRE IN ENGLISH

## Introduction

HAKORIMANA Viateur a Master's student in Medical Surgical track at University of Rwanda (UR) Remera campus, I am conducting research to study "Factors associated with noncompliance to wound care guidelines among nurses working at University Teaching Hospital of Kigali, Rwanda". Our objectives are to determine the level of nurse's knowledge of wound care guidelines, to determine the individual factors to wound care guidelines, to find out the health system and organizational factors associated with noncompliance to wound care guidelines among nurses working at University Teaching Hospital of Kigali, Rwanda.

Your answer is very important and valuable to the study. Please don't put your name on questionnaire, and answer all questions by using symbol (✓) in the corresponding answers to indicate the chosen answers if the response is yes or correct and do not use symbol if the response is NO., we ensure you to note that all answers will be kept in confidential way and presented anonymously and scientifically. Questionnaire is composed by four parts those include sociodemographic characteristic of participants, Nurses' knowledge related to wound care, individual Factors associated with noncompliance to wound care guideline in practice, Factors associated with wound care related to Health service organizational.

## STUDY QUESTIONNAIRE

### 1. Sociodemographic characteristic of participants

| No    | Demographic items      | Answer |
|-------|------------------------|--------|
| 1.1   | <b>SEXE</b>            |        |
| 1.1.1 | Male                   |        |
| 1.1.2 | Female                 |        |
| 1.2   | <b>Age in years</b>    |        |
| 1.2.1 | Less than 35 years old |        |

1.2.2 From 35 to 45 years old

1.2.3 More than 45 years old

**1.3 Marital Status**

1.3.1 Single

1.3.2 Married

1.3.3 Separated

1.3.4. Widower

**1.4 Level of education**

1.4.1 Advanced Diploma A1

1.4.2. Bachelor's Degree A0

1.4.3 Masters and above

**1.5 Experience**

1.5.1 <10years

1.5.2 >10years

**1.6 Working unit (Tick to your unit)**

1.6.1 Orthopedic unit

1.6.2 General surgery unit

1.6.3 Urology and pediatric unit

- 1.6.4 Plastic and burn unit
- 1.6.5 Pre-operative and neurosurgery unit
- 1.6.6 Private ward (Pavillon general and Pavillon ophthalmology)

**1.7 Time (hours) working per shift**

- 1.7.1 8hours
- 1.7.2 12hours
- 1.7.3 24hours

**1.8 Patient caring per shift**

- 1.8.1 1-8 patients
- 1.8.2 8-16 patients
- 1.8.3 16 Patients and above

**1. Nurse's Knowledge related to wound care.**

| No  | Items                                                                                                                                               | Answers |           |
|-----|-----------------------------------------------------------------------------------------------------------------------------------------------------|---------|-----------|
|     |                                                                                                                                                     | Correct | Incorrect |
| 2.1 | The risk of wound infection is increased by immobility, poor nutrition, and the location of the wound.                                              |         |           |
| 2.2 | Wet therapy is the gold standard for treating chronic wound                                                                                         |         |           |
| 2.3 | The selection of the coverage of the wound should be based on characteristic of his deathbed (moisture, drainage or presence of devitalized tissue) |         |           |

- 2.4 The pain in the wound must be evaluated by the health care professional not by the patient.
- 2.5 The first stage of pressure ulcers is easily identified in people of dark skin
- 2.6 Assessment of wound is a cumulative process that comprises observation, data collection and evolution
- 2.7  
The classic signs of infection (pain, heat, redness, swelling pus) may not be present in patient with chronic wound or those who are immunosuppressed
- 2.8 Enzymes (pepsin, collagens,) are effective in the removal of devitalized tissue of chronic wounds.
- 2.9 When taking wound culture, the swab is dipped in wound drainage to assess infection
- 2.10 Irrigation removes debris from wound better than swabbing
- 2.11 The nurses are authorized to use conservative debridement
- 2.12 Wet gauze is more indicated for treating chronic wounds
- 2.13 The Braden scale is an instrument used to assess the risk of a patient developing a vascular ulcer?

## 2. Individual factors associated with noncompliance to wound care guidelines in practice

|     |                                                                           | Answers |    |
|-----|---------------------------------------------------------------------------|---------|----|
| No  | Items                                                                     | Yes     | No |
| 3.1 | Are you familiar with the wound care guidelines in your area of practice? |         |    |

3.2 The following factors are contributing in challenging to comply with wound care guidelines in your daily practice?

3.2.1 Lack of knowledge

3.2.2 Inadequate training

3.2.3 Level of education

3.2.4 Lack of time

3.2.5 Higher workload

3.2.6 Lack of necessary resources

3.2.7 Lack of clear communication or misunderstanding of wound care guideline

3.3 Do you have access to up-to-date wound care guideline in you working place?

3.4 Have you ever experienced stress that made it difficult to consistently follow wound care guideline?

**3. Factors associated with wound care practice related to Health service organizational.**

| No  | Items                                                                                              | Answers |    |
|-----|----------------------------------------------------------------------------------------------------|---------|----|
|     |                                                                                                    | Yes     | No |
| 4.1 | Guideline of wound care are available in working unit?                                             |         |    |
| 4.2 | Dressing material are available in working unit                                                    |         |    |
| 4.3 | Patient load                                                                                       |         |    |
| 4.4 | Does your health care facility provide sufficient training and education on wound care guidelines? |         |    |

- 4.5 Are you satisfied with overall support and resources provided by your health care system to comply with wound care guideline
- 4.6 Are you familiar with antiseptics solution to wound care in your working unit?
- 4.7 Lack of opportunity to express opinion in your unit
- 4.8 Hierarchy pressure contributing to noncompliance of wound care guideline?
- 4.9 Do you have Experience in wound care management?
- 4.10 Have you ever experienced a lack of motivation in adhering to wound care guideline
- 4.11 Lack of leadership support
- 4.12 Inadequate supervision to wound care guideline is the factor for noncompliance?
- 4.13 Do you receive regular feedback and guidance from your supervisors on wound care in the practice?
- 4.14 Absence of accountability is the factor of noncompliance to wound care guideline?
- 4.15 Do you think that lack of interdisciplinary coordination (physician, nurses, other health care providers) would affect the compliance of wound care guideline?

The questionnaire that was used in this study was that described by Tegegne, *et al* (2022).

## APPROVAL FOR USING THE QUESTIONNAIRE

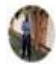

**viateur hakorimana** <hakoviate@gmail.com>

to zeme.mengesha141414 ▼

Jun 27, 2023, 5:02 PM

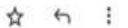

Hello Dear Zeme Mengesha,

I am HAKORIMANA Viateur i am here to request a permission to use our tools (questionnaire) used on <Knowledge and Practice of Wound Care and Associated Factors among Nurses Working in South Wollo Zone Government Hospitals, Ethiopia>

In fact I am Masters student ( Medical Surgical Track ) in the school of nursing and midwifery at University of Rwanda and i am doing the research on

Factors responsible for noncompliance to wound care guideline among nurses working at referral hospital in Rwanda >

if you allow me , i will contextualize it in Rwanda context and i will also acknowledge you in my research

Thanks for your help.

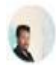

**Zemen Mengesha** <zeme.mengesha141414@gmail.com>

to me ▼

Jun 29, 2023, 5:08 PM

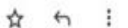

Yes, of course you can!

\*\*\*
